# Supplementary material for: Understanding local population genetics improves variant interpretation in rare genetic disorders
Source: Research Square preprint supplement (doi:10.21203/rs.3.rs-7448520/v1), 2025-09-30
Supplement: Supplementary file 1 [file c33129bf28076be382b68f60.xlsx]

## Sheet: Supplementary Table 1
Gene	IRExom_pLI	gnomAD_LOEUF
A1BG	0.5	1.34
A1CF	0.5	0.825
A2M	0	0.765
A2ML1	0.4	0.953
A3GALT2	0.5	1.529
A4GALT	0.5	1.393
A4GNT	0.5	1.375
AAAS	0.5	0.921
AACS	0.5	0.967
AADAC	0.5	1.126
AADACL2	0.5	1.529
AADACL3	0.5	1.25
AADACL4	0.5	1.063
AADAT	0.5	0.625
AAGAB	0.25	1.156
AAK1	0.5	0.406
AAMDC	0.5	1.571
AAMP	0.5	0.372
AANAT	0.5	1.283
AAR2	0.5	1.472
AARD	0.5	1.719
AARS2	0.5	0.752
AARSD1	0.5	1.122
AASDH	0.5	0.946
AASDHPPT	0.5	0.754
AASS	0.5	0.948
AATF	0.5	1.033
AATK	0.5	1.574
ABAT	0.5	0.871
ABCA1	0.5	0.563
ABCA10	0.456522	1.044
ABCA12	0.571429	0.582
ABCA13	0.5	1.063
ABCA2	0.25	0.436
ABCA3	0.5	0.612
ABCA4	0.714286	0.786
ABCA5	0.5	0.97
ABCA6	0.5	1.041
ABCA7	0.545455	1.368
ABCA8	0.5	1.086
ABCA9	0.5	1.006
ABCB1	0.5	0.575
ABCB10	0.5	1.142
ABCB11	0.5	0.739
ABCB4	0.5	0.623
ABCB5	0.5	1.178
ABCB6	0.5	0.984
ABCB8	0.5	0.894
ABCB9	0.5	0.796
ABCC1	0.5	0.564
ABCC10	0.5	0.894
ABCC11	0.5	1.004
ABCC12	0.4375	1.022
ABCC2	0.625	0.985
ABCC3	0.5	0.831
ABCC4	0.5	0.647
ABCC5	0.5	0.455
ABCC6	0.666667	0.917
ABCC8	1	0.829
ABCC9	0.5	0.557
ABCD2	0.5	0.714
ABCD3	0.5	0.484
ABCD4	0.5	0.772
ABCE1	0.5	0.466
ABCF1	0.5	0.69
ABCF2	0.5	0.61
ABCF3	0.5	0.776
ABCG1	0.5	0.573
ABCG2	0.5	1.308
ABCG4	0.5	0.694
ABCG5	1	1.219
ABCG8	1	1.329
ABHD1	0.5	1.359
ABHD10	0.5	1.037
ABHD11	0.5	1.194
ABHD12	0.5	0.967
ABHD12B	0.5	1.148
ABHD13	0.5	0.504
ABHD14A	0.5	1.081
ABHD14B	0.5	1.789
ABHD15	0.5	1.479
ABHD16A	0.5	0.686
ABHD16B	0.5	1.955
ABHD17A	0.5	0.783
ABHD17B	0.5	0.579
ABHD17C	0.5	0.919
ABHD18	0.5	1.028
ABHD2	0.5	0.57
ABHD3	0.5	1.211
ABHD4	0.5	1.038
ABHD5	0.5	0.922
ABHD6	0.5	1.067
ABHD8	0.5	0.664
ABI1	0.5	0.41
ABI2	0.5	0.585
ABI3	0.5	1.113
ABI3BP	0.5	0.945
ABL1	0.5	0.19
ABL2	0.5	0.578
ABLIM1	0.5	0.515
ABLIM2	0.5	0.743
ABLIM3	0.5	0.691
ABR	0.5	0.431
ABRA	0.5	0.993
ABRACL	0.5	1.243
ABT1	0.5	1.2
ABTB1	0.5	1.003
ABTB2	0.5	0.733
ACAA1	0.5	1.199
ACAA2	0.5	1.148
ACACA	0.5	0.374
ACACB	0.5	0.843
ACAD10	0.5	1.05
ACAD11	0.5	1.01
ACAD8	0.5	1.11
ACAD9	0.5	0.884
ACADL	0.5	1.262
ACADM	0.25	1.072
ACADS	0.5	0.852
ACADSB	0.5	0.891
ACADVL	0.75	1.077
ACAN	0.5	0.377
ACAP1	0.5	0.579
ACAP2	0.5	0.47
ACAP3	0.5	0.816
ACAT1	0.5	0.798
ACAT2	0.5	0.99
ACBD3	0.5	0.634
ACBD4	0.5	1.09
ACBD5	0.5	0.734
ACBD6	0.5	1.037
ACBD7	0.5	1.515
ACCS	0.5	0.899
ACCSL	0.5	1.037
ACD	0.5	0.921
ACE	0.333333	0.88
ACER1	0.5	1.411
ACER2	0.5	1.155
ACER3	1	0.815
ACHE	0.5	0.546
ACIN1	0.5	0.15
ACKR1	0.5	1.841
ACKR2	0.5	1.934
ACKR3	0.5	0.492
ACKR4	0.5	1.218
ACLY	0.5	0.401
ACMSD	0.5	1.063
ACO1	0.5	0.839
ACO2	0.5	0.489
ACOD1	0.5	1.53
ACOT1	0.5	1.531
ACOT11	0.5	1.088
ACOT12	0.5	0.92
ACOT13	0.5	1.452
ACOT2	0.5	1.191
ACOT4	0.5	1.586
ACOT6	0.5	1.96
ACOT7	0.5	0.468
ACOT8	0.5	1.096
ACOX1	0.5	0.67
ACOX2	1	0.914
ACOX3	0.5	1.114
ACOXL	0.5	1.239
ACP1	0.5	1.547
ACP2	0.5	0.804
ACP5	0.5	1.14
ACP6	0.5	1.313
ACP7	0.5	1.147
ACR	0.5	0.943
ACRBP	0.5	0.911
ACRV1	0.5	0.822
ACSBG1	0.5	0.594
ACSBG2	0.5	0.99
ACSF2	0.5	0.844
ACSF3	0.666667	1.715
ACSL1	0.5	0.555
ACSL3	0.5	0.605
ACSL5	0.5	0.702
ACSL6	0.5	0.584
ACSM1	0.5	1.248
ACSM2A	0.5	1.233
ACSM2B	0.5	0.956
ACSM3	0.5	0.999
ACSM4	0.5	1.072
ACSM5	0.5	1.003
ACSS1	0.5	0.712
ACSS2	0.5	0.785
ACSS3	0.5	0.931
ACTA1	0.5	0.931
ACTA2	0.5	0.472
ACTB	0.5	0.193
ACTBL2	0.5	1.624
ACTC1	0.5	0.511
ACTG1	0.5	0.617
ACTG2	0.5	0.626
ACTL10	0.5	1.947
ACTL6A	0.5	0.186
ACTL6B	0.5	0.954
ACTL7A	0.5	1.182
ACTL7B	0.5	1.414
ACTL8	0.5	0.756
ACTL9	0.5	1.575
ACTN1	0.5	0.331
ACTN2	0	0.432
ACTN3	0.625	0.944
ACTN4	0.5	0.238
ACTR10	0.5	1.148
ACTR1A	0.5	0.337
ACTR1B	0.5	0.968
ACTR2	0.5	0.177
ACTR3	0.5	0.461
ACTR3B	0.5	0.328
ACTR3C	0.25	1.046
ACTR5	0.5	0.986
ACTR6	0.5	1.017
ACTR8	0.5	1.033
ACTRT2	0.5	1.307
ACTRT3	0.5	1.242
ACVR1	0.5	0.835
ACVR1B	0.5	0.403
ACVR1C	0.5	0.6
ACVR2A	0.5	0.222
ACVR2B	0.5	0.408
ACVRL1	0.5	0.57
ACY1	0.5	0.9
ACY3	0.5	1.196
ACYP1	0.5	1.301
ACYP2	0.5	1.728
ADA	0.5	1.184
ADAD1	0.5	0.778
ADAD2	0.5	1.524
ADAL	0.5	1.204
ADAM10	0.5	0.276
ADAM11	0.5	0.584
ADAM12	0.5	0.818
ADAM15	0.5	0.826
ADAM17	0.5	0.565
ADAM18	0.5	1.585
ADAM19	0.5	0.739
ADAM2	0.5	1.188
ADAM20	0.5	1.933
ADAM21	0.5	1.913
ADAM22	0.5	0.518
ADAM23	0.5	0.416
ADAM28	0.5	1.23
ADAM29	0.5	1.939
ADAM30	0.5	1.903
ADAM32	0.5	1.041
ADAM33	0.444444	1.291
ADAM7	0.5	1.16
ADAM8	0.5	1.423
ADAM9	0.5	0.575
ADAMDEC1	0.5	1.234
ADAMTS1	0.5	0.329
ADAMTS10	0.5	0.467
ADAMTS12	0.5	0.782
ADAMTS13	0.75	0.917
ADAMTS14	0.5	0.966
ADAMTS15	0.5	0.599
ADAMTS16	0.5	0.794
ADAMTS17	0.5	0.966
ADAMTS18	0.5	1.055
ADAMTS19	0.5	0.83
ADAMTS2	0.5	0.568
ADAMTS20	0.5	0.947
ADAMTS3	0.5	0.67
ADAMTS4	0.5	0.732
ADAMTS5	0.5	0.818
ADAMTS6	0.5	0.228
ADAMTS7	0.5	0.761
ADAMTS8	0.5	1.076
ADAMTS9	0.5	0.469
ADAMTSL1	0.5	0.744
ADAMTSL2	0	0.679
ADAMTSL3	0.5	0.692
ADAMTSL4	0.625	0.92
ADAMTSL5	0.5	1.407
ADAP1	0.5	0.949
ADAP2	0.5	1.031
ADAR	0.5	0.449
ADARB1	0.5	0.323
ADARB2	0.5	0.681
ADAT1	0.5	1.193
ADAT2	0.5	1.326
ADAT3	0.5	1.929
ADCK1	0.5	0.916
ADCK2	0.5	0.921
ADCK5	0.5	0.999
ADCY1	0.5	0.346
ADCY10	0.5	0.922
ADCY2	0.5	0.329
ADCY3	0.5	0.695
ADCY4	0.5	1.089
ADCY5	0.5	0.326
ADCY6	0.5	0.639
ADCY7	0.5	0.738
ADCY8	0.5	0.586
ADCY9	0.5	0.603
ADCYAP1	0.5	0.864
ADCYAP1R1	0.5	0.797
ADD1	0.5	0.387
ADD2	0.5	0.388
ADD3	0.5	0.395
ADGB	0.5	0.941
ADGRA1	0.5	1.025
ADGRA2	0.5	0.943
ADGRA3	0.5	0.607
ADGRB1	0.5	0.372
ADGRB2	0.5	0.383
ADGRB3	0.5	0.246
ADGRD1	0.5	0.826
ADGRE1	0.5	0.951
ADGRE2	0.333333	1.028
ADGRE3	0.5	1.265
ADGRE5	0.5	0.973
ADGRF1	0.5	1.247
ADGRF3	0.5	1.069
ADGRF4	0.5	1.36
ADGRF5	0.5	0.719
ADGRG1	0.5	0.871
ADGRG3	0.5	0.93
ADGRG5	0.5	0.982
ADGRG6	0.5	0.63
ADGRG7	0.5	1.194
ADGRL1	0.5	0.302
ADGRL2	0.5	0.301
ADGRL3	0.5	0.451
ADGRL4	0.5	1.44
ADGRV1	0.5	0.637
ADH1A	0.5	1.104
ADH1B	0.5	1.013
ADH1C	0.5	0.991
ADH4	0.5	1.077
ADH5	0.5	1.191
ADH6	0.5	1.263
ADH7	0.5	1.429
ADHFE1	0.5	0.966
ADI1	0.5	1.713
ADIG	0.5	1.845
ADIPOQ	0.5	1.655
ADIPOR1	0.5	0.571
ADIPOR2	0.5	0.636
ADIRF	0.5	1.788
ADK	0.5	0.893
ADM	0.5	0.581
ADM2	0.5	1.901
ADM5	0.5	1.818
ADNP	0.5	0.106
ADNP2	0.5	0.896
ADO	0.5	1.476
ADORA1	0.5	0.598
ADORA2A	0.5	0.846
ADORA2B	0.5	1.412
ADORA3	0.5	1.204
ADPGK	0.5	0.937
ADPRH	0.5	1.165
ADPRHL1	0.454545	1.264
ADPRM	0.5	0.959
ADRA1A	0.5	1.343
ADRA1B	0.5	1.449
ADRA1D	0.5	1.772
ADRA2A	0.5	1.783
ADRA2B	0.5	1.556
ADRA2C	0.5	1.116
ADRB1	0.5	1.939
ADRB2	0.5	0.901
ADRB3	0.5	1.952
ADRM1	0.5	0.188
ADSL	0.75	0.915
ADTRP	0.5	1.074
AEBP1	0.5	0.735
AEBP2	0.5	0.461
AEN	0.5	1.666
AFAP1	0.5	0.918
AFAP1L1	0.5	0.944
AFAP1L2	0.5	0.605
AFDN	0.5	0.398
AFF1	0.5	0.49
AFF3	0.5	0.318
AFF4	0.5	0.114
AFG3L2	0.5	0.724
AFM	0.5	1.44
AFMID	0.5	1.018
AFP	0.5	0.963
AGA	0.5	0.938
AGAP1	0.25	0.366
AGAP2	0.5	0.414
AGAP3	0.5	0.359
AGAP4	0.5	0.761
AGAP5	0.5	0.717
AGAP6	0.454545	0.757
AGAP9	0.5	0.823
AGBL1	0.5	1.313
AGBL2	0.375	0.944
AGBL3	0.5	0.893
AGBL4	0.5	1.107
AGBL5	0.5	0.709
AGER	0.5	1.068
AGFG1	0.5	0.286
AGFG2	0.5	0.873
AGGF1	0.5	0.808
AGK	0.5	0.918
AGL	0.25	0.72
AGMAT	0.5	1.712
AGMO	0.375	1.561
AGO1	0.5	0.164
AGO2	0.5	0.102
AGO3	0.5	0.232
AGO4	0.5	0.393
AGPAT1	0.5	0.367
AGPAT2	0.5	1.199
AGPAT3	0.5	0.21
AGPAT4	0.5	0.461
AGPAT5	0.5	1.391
AGPS	0.5	0.408
AGR2	0.5	1.34
AGR3	0.5	1.932
AGRN	0.5	0.73
AGRP	0.5	1.091
AGT	0.5	1.202
AGTPBP1	0.5	0.556
AGTR1	0.5	1.113
AGTRAP	0.5	0.838
AGXT	0.5	1.251
AGXT2	0.4	1.185
AHCTF1	0.5	0.142
AHCY	0.5	0.727
AHCYL1	0.5	0.34
AHCYL2	0.5	0.516
AHDC1	0.5	0.168
AHI1	0.666667	1.069
AHNAK	0.5	0.793
AHNAK2	0.5	0.917
AHR	0.5	0.606
AHRR	0.5	0.897
AHSA1	0.5	0.505
AHSG	0.75	1.042
AHSP	0.5	1.947
AICDA	0.5	1.144
AIDA	0.5	0.545
AIF1	0.5	1.407
AIF1L	0.5	1.102
AIFM2	0.5	1.404
AIFM3	0.5	1.109
AIG1	0.5	1.279
AIM2	0.5	1.421
AIMP1	0.5	0.931
AIMP2	0.5	1.107
AIP	0.5	0.626
AIPL1	1	1.01
AIRE	0.5	1.169
AJAP1	0.5	0.376
AJUBA	0.5	0.581
AK1	0.5	0.873
AK2	0.5	0.954
AK3	0.5	1.602
AK4	0.5	0.942
AK5	0.5	0.5
AK6	0.5	1.377
AK7	0.5	0.945
AK8	0.5	1.12
AK9	0.4375	0.848
AKAIN1	0.5	1.506
AKAP1	0.5	0.526
AKAP10	0.5	0.381
AKAP11	0.5	0.319
AKAP12	0.5	0.496
AKAP13	0.5	0.362
AKAP3	0.5	0.62
AKAP5	0.5	0.698
AKAP6	0.5	0.367
AKAP7	0.5	1.33
AKAP8	0.5	0.48
AKAP8L	0.5	0.592
AKAP9	0.5	0.662
AKIP1	0.5	1.324
AKIRIN1	0.5	0.435
AKIRIN2	0.5	0.459
AKNA	0.5	0.631
AKNAD1	0.5	0.912
AKR1A1	0.5	0.871
AKR1B1	0.5	0.75
AKR1B10	0.5	1.324
AKR1B15	0.5	1.527
AKR1C1	0.5	1.255
AKR1C2	0.5	1.035
AKR1C3	0.5	1.34
AKR1C4	0.5	1.337
AKR1D1	0.5	1.157
AKR1E2	0	1.302
AKR7A2	0.5	1.062
AKR7A3	0.5	1.409
AKT1	0.5	0.474
AKT1S1	0.5	1.49
AKT2	0.5	0.398
AKT3	0.5	0.482
AKTIP	0.5	0.612
ALAD	0.5	0.63
ALAS1	0.5	0.649
ALB	0.5	0.577
ALCAM	0.5	0.474
ALDH16A1	0.5	1.183
ALDH18A1	0.5	0.617
ALDH1A1	0.5	0.542
ALDH1A2	0.5	0.581
ALDH1A3	0.5	0.667
ALDH1B1	0.25	1.029
ALDH1L1	0.5	0.822
ALDH1L2	0.5	0.974
ALDH2	0.5	0.989
ALDH3A1	0.5	1.246
ALDH3A2	0.5	0.972
ALDH3B1	0.5	1.217
ALDH4A1	1	0.902
ALDH5A1	1	0.852
ALDH6A1	0.75	0.835
ALDH7A1	0.5	0.983
ALDH8A1	0.5	1.113
ALDH9A1	0.5	0.887
ALDOA	0.5	0.821
ALDOB	0.75	1.183
ALDOC	0.5	0.785
ALG1	0.5	1.419
ALG10	0.5	0.901
ALG10B	0.5	1.018
ALG11	0.5	0.908
ALG12	0.5	0.965
ALG14	0.75	1.055
ALG1L2	0.5	1.607
ALG2	0.5	1.408
ALG3	0.75	0.972
ALG5	0.5	0.823
ALG6	0.5	0.892
ALG8	0.5	0.909
ALK	0.5	0.562
ALKAL1	0.5	1.944
ALKAL2	0.5	1.297
ALKBH1	0.5	1.128
ALKBH2	0.5	1.392
ALKBH3	0.5	1.434
ALKBH4	0.5	1.035
ALKBH5	0.5	0.19
ALKBH6	0.5	1.152
ALKBH7	0.5	1.675
ALKBH8	0.5	0.797
ALLC	0.5	1.144
ALMS1	0.571429	0.825
ALOX12	0.5	0.921
ALOX12B	0.5	0.783
ALOX15	0.5	1.117
ALOX15B	0.5	1.263
ALOX5	0.5	0.933
ALOX5AP	0.5	0.795
ALOXE3	0.5	1.036
ALPI	0.5	1.163
ALPK1	0.5	1.079
ALPK2	0.5	0.862
ALPK3	0.25	0.874
ALPL	0.5	0.987
ALPP	0.5	1.117
ALS2	0.5	0.649
ALS2CL	0.5	1.08
ALX1	0.5	0.838
ALX3	0.5	1.051
ALX4	0.5	0.902
ALYREF	0.5	0.235
AMACR	0.5	1.239
AMBN	0.5	1.345
AMBP	0.5	1.017
AMBRA1	0.5	0.491
AMD1	0.5	0.442
AMDHD1	0.5	1.381
AMDHD2	0.5	0.868
AMER2	0.5	0.655
AMER3	0.5
AMFR	0.5	0.633
AMH	0.666667	1.954
AMHR2	0.5	0.784
AMIGO1	0.5	0.099
AMIGO2	0.5	0.97
AMIGO3	0.5	1.844
AMMECR1L	0.5	0.257
AMN	0.5	1.446
AMN1	0.5	0.838
AMOTL1	0.5	0.581
AMOTL2	0.5	0.574
AMPD1	0.5	1.036
AMPD2	0.5	0.705
AMPD3	0.5	0.817
AMPH	0.5	0.697
AMT	0.5	0.805
AMTN	0.5	1.656
AMY1A	0.5	1.903
AMY1C	0.5	0.564
AMY2A	0.5	0.848
AMY2B	0.5	1.395
AMZ1	0.375	1.88
AMZ2	0.25	1.004
ANAPC1	0	0.273
ANAPC10	0.5	0.863
ANAPC11	0.5	0.785
ANAPC13	0.5	1.596
ANAPC15	0.5	0.939
ANAPC16	0.5	0.847
ANAPC2	0.5	0.482
ANAPC4	0.5	0.757
ANAPC5	0.5	0.889
ANAPC7	0.5	0.478
ANG	0.5	1.697
ANGEL1	0.5	0.98
ANGEL2	0.5	0.788
ANGPT1	0.5	0.414
ANGPT2	0.5	0.606
ANGPT4	0.5	1.189
ANGPTL1	0.5	0.981
ANGPTL2	0.5	0.643
ANGPTL3	0.5	1.209
ANGPTL4	0.5	1.481
ANGPTL5	0.375	1.158
ANGPTL6	0.5	1.338
ANGPTL7	0.5	1.231
ANGPTL8	0.5	1.749
ANHX	0.5	0.776
ANK1	0.5	0.299
ANK2	0.5	0.271
ANK3	0.5	0.16
ANKAR	0.428571	1.07
ANKDD1A	0.5	1.137
ANKDD1B	0.333333	1.173
ANKEF1	0.5	0.77
ANKFN1	0.5	0.741
ANKFY1	0.5	0.463
ANKH	0.5	0.463
ANKHD1	0.5	0.178
ANKIB1	0.5	0.533
ANKK1	0.375	1.382
ANKLE1	0.5	1.368
ANKLE2	0.5	0.825
ANKMY1	0.5	1.141
ANKMY2	0.5	0.913
ANKRA2	0.5	1.358
ANKRD1	0.5	1.038
ANKRD10	0.5	1.035
ANKRD11	0.5	0.132
ANKRD12	0.5	0.583
ANKRD13A	0.5	0.72
ANKRD13B	0.5	0.672
ANKRD13C	0.5	0.449
ANKRD13D	0.5	0.552
ANKRD16	0.5	1.356
ANKRD17	0.5	0.118
ANKRD18A	0.5	0.872
ANKRD18B	0.5	0.89
ANKRD2	0.5	1.426
ANKRD20A1	0.5	0.512
ANKRD22	0.5	1.513
ANKRD23	0.5	1.671
ANKRD24	0.5	1.255
ANKRD26	0.5	0.728
ANKRD27	0.5	0.965
ANKRD28	0.5	0.455
ANKRD29	0.5	1.187
ANKRD30A	0.5	1.295
ANKRD30B	0.5	0.981
ANKRD30BL	0.5	1.929
ANKRD31	0.5	0.844
ANKRD33	0.5	1.351
ANKRD33B	0.5	0.682
ANKRD34A	0.5	0.468
ANKRD34B	0.5
ANKRD34C	0.5	1.761
ANKRD35	0.5	1.071
ANKRD36	0.517857	1.132
ANKRD36B	0.5	0.569
ANKRD37	0.5	1.265
ANKRD39	0.5	1.375
ANKRD40	0.5	0.936
ANKRD42	0.5	1.08
ANKRD44	0.5	0.365
ANKRD45	0.5	1.119
ANKRD46	0.5	0.965
ANKRD49	0.5	1.221
ANKRD50	0.5	0.439
ANKRD52	0.5	0.122
ANKRD53	0.5	1.379
ANKRD54	0.5	1.126
ANKRD55	0.5	0.843
ANKRD6	0.5	0.869
ANKRD61	0.5	1.498
ANKRD62	0.5	0.942
ANKRD63	0.5	1.835
ANKRD65	0.5	1.968
ANKRD66	0.5	1.579
ANKRD7	0.5	1.219
ANKRD9	0.5	1.966
ANKS1A	0.5	0.549
ANKS1B	0.5	0.298
ANKS3	0.5	1.102
ANKS4B	0.5	1.325
ANKS6	1	0.869
ANKUB1	0.5	1.083
ANKZF1	0.5	1.125
ANLN	0.5	0.537
ANO1	0.5	0.618
ANO10	0.5	1.24
ANO2	0.5	1.022
ANO3	0.5	0.911
ANO4	0.5	0.576
ANO5	0.5	1.034
ANO6	0.5	1.02
ANO7	0.357143	1.159
ANO8	0.5	0.795
ANO9	0.5	1.022
ANP32A	0.5	0.143
ANP32B	0.5	0.364
ANP32D	0.5	1.433
ANP32E	0.5	0.762
ANPEP	0.5	0.705
ANTXR1	0.5	0.346
ANTXR2	0.75	0.981
ANTXRL	0.5	1.004
ANXA1	0.5	1.182
ANXA10	0.5	1.146
ANXA11	0.5	1.086
ANXA13	0.5	0.96
ANXA2	0.5	0.985
ANXA2R	0.5
ANXA3	0.5	1.244
ANXA4	0.5	1.077
ANXA5	0.5	1.465
ANXA6	0.5	0.872
ANXA7	0.5	1.055
ANXA8	0.5	0.726
ANXA8L1	0.5	1.812
ANXA9	0.5	1.091
AOAH	0.5	0.876
AOC1	0.5	1.253
AOC2	0.5	1.292
AOC3	0.5	1.056
AOX1	0.5	1.009
AP1AR	0.5	1.048
AP1B1	0.5	0.476
AP1G1	0.5	0.113
AP1G2	0.5	1.004
AP1M1	0.5	0.474
AP1M2	0.5	1.073
AP1S1	1	1.078
AP1S3	0.5	0.817
AP2A1	0.5	0.331
AP2A2	0.5	0.437
AP2B1	0.5	0.275
AP2M1	0.5	0.182
AP2S1	0.5	0.478
AP3B1	0.5	0.59
AP3B2	0.5	0.52
AP3D1	0.5	0.443
AP3M1	0.5	0.823
AP3M2	0.5	0.858
AP3S1	0.5	1.433
AP3S2	0.5	1.304
AP4B1	1	0.777
AP4E1	0.5	0.576
AP4M1	0.75	1.106
AP4S1	0.5	1.675
AP5B1	0.5	1.424
AP5M1	0.5	1.061
AP5S1	0.5	1.528
AP5Z1	0.75	1.641
APAF1	0.5	0.664
APBA1	0.5	0.978
APBA2	0.5	0.524
APBA3	0.5	1.237
APBB1	0.5	0.401
APBB1IP	0.5	0.585
APBB2	0.5	0.54
APBB3	0.5	0.973
APC	0.5	0.321
APC2	0.5	0.961
APCDD1	0.5	0.586
APCDD1L	0.5	1.86
APCS	0.5	1.826
APEH	0.5	0.87
APEX1	0.5	1.225
APH1A	0.5	0.806
APH1B	0.5	1.327
API5	0.5	0.211
APIP	0.5	1.423
APLF	0.5	1.451
APLNR	0.5	0.81
APLP1	0.5	0.713
APLP2	0.5	0.723
APMAP	0.5	1.14
APOA1	0.5	1.168
APOA2	0.5	1.012
APOA4	0.5	0.985
APOA5	0.5	1.146
APOB	0.5	0.537
APOBEC1	0.5	1.086
APOBEC2	0.5	1.085
APOBEC3A	0.5	0.9
APOBEC3B	0.5	0.854
APOBEC3C	0.5	1.056
APOBEC3F	0.5	1.014
APOBEC3G	0.5	1.103
APOBEC3H	0.5	0.651
APOBEC4	0.5	1.412
APOBR	0.25	0.99
APOC1	0.5	1.483
APOC3	0.7	1.68
APOC4	0.5	1.817
APOD	0.5	1.436
APOE	0.5	1.319
APOF	0.5	1.885
APOH	0.5	1.542
APOL1	0.5	1.68
APOL2	0.5	1.704
APOL4	0.5	1.863
APOL5	0.333333	1.093
APOL6	0.5	1.656
APOLD1	0.5	1.959
APOM	0.5	1.437
APP	0.5	0.41
APPBP2	0.5	0.34
APPL1	1	0.524
APPL2	0.5	1.075
APRT	0.5	1.789
APTX	0.583333	0.973
AQP1	0.5	0.915
AQP10	0.5	0.991
AQP11	0.5	1.743
AQP12A	0.5	1.828
AQP12B	0.5	1.875
AQP2	0.5	1.375
AQP3	0.5	0.838
AQP4	0.5	0.903
AQP5	0.5	1.316
AQP6	0.5	1.396
AQP7	0.5	1.24
AQP8	0.5	0.819
AQP9	0.5	1.16
AQR	0.5	0.413
ARAP1	0.5	0.572
ARAP2	0.5	0.884
ARAP3	0.5	0.598
ARC	0.5	1.393
ARCN1	0.5	0.145
AREG	0.5	0.823
AREL1	0.5	0.739
ARF1	0.5	0.247
ARF4	0.5	0.418
ARF5	0.5	0.685
ARF6	0.5	0.251
ARFGAP1	0.5	0.632
ARFGAP2	0.5	0.8
ARFGAP3	0.5	1.116
ARFGEF1	0.5	0.236
ARFGEF2	0.5	0.391
ARFGEF3	0.5	0.588
ARFIP1	0.5	0.869
ARFIP2	0.5	0.543
ARFRP1	0.5	0.935
ARG1	0.5	0.833
ARG2	0.5	0.78
ARGFX	0.5	1.843
ARGLU1	0.5	0.396
ARHGAP1	0.5	0.601
ARHGAP10	0.5	0.894
ARHGAP11A	1	0.8
ARHGAP12	0.5	0.681
ARHGAP15	0.5	1.134
ARHGAP17	0.5	0.753
ARHGAP18	0.5	0.931
ARHGAP20	0.5	0.613
ARHGAP21	0.5	0.261
ARHGAP22	0.5	1.141
ARHGAP23	0.5	0.414
ARHGAP24	0.5	0.797
ARHGAP25	0.5	0.627
ARHGAP26	0.5	0.493
ARHGAP27	0.5	0.709
ARHGAP28	0.5	0.796
ARHGAP29	0.5	0.448
ARHGAP30	0.5	0.429
ARHGAP31	0.5	0.38
ARHGAP32	0.5	0.349
ARHGAP33	0.5	0.59
ARHGAP35	0.5	0.204
ARHGAP39	0.5	0.658
ARHGAP42	0.5	0.666
ARHGAP44	0.5	0.605
ARHGAP45	0.5	0.75
ARHGAP5	0.5	0.295
ARHGAP8	0.5	1.648
ARHGAP9	0.5	1.023
ARHGDIA	0.5	0.606
ARHGDIB	0.5	0.881
ARHGDIG	0.5	1.297
ARHGEF1	0.5	0.459
ARHGEF10	0.5	1.062
ARHGEF10L	0.5	0.654
ARHGEF11	0.5	0.336
ARHGEF12	0.5	0.369
ARHGEF15	0.5	0.917
ARHGEF16	0.5	1.018
ARHGEF17	0.5	0.57
ARHGEF18	0.5	0.811
ARHGEF19	0.5	1.327
ARHGEF2	0.5	0.259
ARHGEF25	0.5	0.762
ARHGEF26	0.5	0.861
ARHGEF28	0.5	0.895
ARHGEF3	0.5	0.591
ARHGEF33	0.5	0.947
ARHGEF35	0.5	1.886
ARHGEF37	0.5	0.962
ARHGEF38	0.5	1.21
ARHGEF39	0.5	1.264
ARHGEF4	0.5	0.884
ARHGEF40	0.5	0.722
ARHGEF5	0.5	0.414
ARHGEF7	0.5	0.53
ARID1A	0.5	0.141
ARID1B	0.5	0.205
ARID2	0.5	0.224
ARID3A	0.5	0.442
ARID3B	0.5	0.332
ARID4A	1	0.339
ARID4B	0.5	0.176
ARID5A	0.5	0.802
ARID5B	0.5	0.211
ARIH1	0.5	0.302
ARIH2	0.5	0.242
ARL1	0.5	0.906
ARL10	0.5	1.521
ARL11	0	1.844
ARL13B	0.5	0.894
ARL14	0.5	1.682
ARL14EP	0.5	0.823
ARL14EPL	0.5	1.402
ARL15	0.5	1.304
ARL16	0.5	1.929
ARL2	0.5	0.935
ARL2BP	0.5	1.03
ARL3	0.5	0.557
ARL4A	0.5	0.77
ARL4C	0.5	0.796
ARL4D	0.5	1.8
ARL5A	0.5	0.926
ARL5B	0.5	0.572
ARL5C	0.5	1.386
ARL6	0.5	0.956
ARL6IP4	0.5	1.277
ARL6IP5	0.5	0.856
ARL6IP6	0.5	1.43
ARL8A	0.5	0.58
ARL8B	0.5	0.698
ARL9	0.5	0.968
ARMC1	0.5	0.885
ARMC10	0.5	1.341
ARMC12	0.5	0.88
ARMC2	0.5	0.936
ARMC3	0.5	0.91
ARMC5	0.5	0.772
ARMC6	0.5	1.112
ARMC7	0.5	1.005
ARMC8	0.5	0.317
ARMC9	1	0.975
ARMS2	0	1.815
ARMT1	0.5	1.083
ARNT	0.5	0.387
ARNT2	0.5	0.498
ARNTL	0.5	0.25
ARNTL2	0.5	0.831
ARPC1B	0.5	0.876
ARPC2	0.5	0.319
ARPC3	0.5	0.678
ARPC4	0.5	0.362
ARPC5	0.5	0.725
ARPC5L	0.5	0.608
ARPP19	0.5	1.746
ARPP21	0.5	0.711
ARRB1	0.5	0.611
ARRB2	0.5	0.562
ARRDC1	0.5	1.191
ARRDC2	0.5	1.297
ARRDC3	0.5	0.325
ARRDC4	0.5	1.309
ARRDC5	0.5	1.342
ARSA	0.5	1.166
ARSB	0.5	1.032
ARSG	0.5	0.996
ARSI	0.5	1.403
ARSJ	0.5	0.951
ARSK	0.5	0.954
ART1	0.5	1.476
ART3	0.5	1.377
ART4	0.5	0.895
ART5	0.5	1.332
ARTN	0.5	1.206
ARV1	1	1.131
ARVCF	0.5	1.032
AS3MT	0.5	1.26
ASAH1	0.428571	1.435
ASAH2	0.5	0.838
ASAH2B	0.5
ASAP1	0.5	0.439
ASAP2	0.5	0.465
ASAP3	0.5	0.864
ASB1	0.5	0.951
ASB10	0.5	1.634
ASB13	0.5	1.686
ASB14	0.5	1.35
ASB15	0.5	1.186
ASB16	0.5	1.675
ASB17	0.5	1.363
ASB18	0.5	1.764
ASB2	0.5	1.243
ASB4	0.5	1.226
ASB5	0.5	1.317
ASB6	0.5	1.225
ASB7	0.5	0.277
ASB8	0.5	1.004
ASCC1	0.25	1.002
ASCC2	0.5	0.593
ASCC3	0.5	0.677
ASCL1	0.5	0.51
ASCL2	0.5	1.962
ASCL3	0.5	1.504
ASCL4	0.5	1.921
ASCL5	0.5	1.704
ASF1A	0.5	0.571
ASF1B	0.5	0.91
ASGR1	0.5	1.323
ASGR2	0.5	1.365
ASH1L	0.5	0.104
ASH2L	0.5	0.529
ASIC1	0.5	0.468
ASIC2	0.5	0.591
ASIC3	0.5	1.018
ASIC4	0.5	0.69
ASIC5	0.5	1.286
ASIP	0.5	1.794
ASL	0.5	0.937
ASNS	1	0.745
ASNSD1	0.5	0.939
ASPA	1	1.098
ASPDH	0.5	1.216
ASPG	0.5	1.226
ASPH	0.5	1.011
ASPHD1	0.5	1.102
ASPHD2	0.5	0.547
ASPM	0.5625	0.766
ASPRV1	0.5	1.252
ASPSCR1	0.5	1.051
ASRGL1	0.5	1.121
ASS1	0.5	1.14
ASTE1	0.5	1.291
ASTL	0.25	1.024
ASTN1	0.5	0.392
ASTN2	0.5	0.473
ASXL1	0.5	0.918
ASXL2	0.5	0.239
ASXL3	0.5	0.229
ASZ1	0.5	1.304
ATAD1	0.5	0.505
ATAD2	0.5	0.449
ATAD2B	0.5	0.376
ATAD3A	0.5	0.861
ATAD3B	0.5	1.152
ATAD3C	0.5	1.15
ATAD5	0.5	0.417
ATAT1	0.5	0.975
ATCAY	0.5	0.725
ATE1	0.5	0.687
ATF1	0.5	0.683
ATF2	0.5	0.539
ATF3	0.5	0.879
ATF4	0.5	0.718
ATF5	0.5	1.596
ATF6	0.5	0.882
ATF6B	0.5	0.752
ATF7	0.5	0.391
ATF7IP	0.5	0.294
ATF7IP2	0.5	0.909
ATG10	0.5	1.744
ATG101	0.5	0.681
ATG12	0.5	1.671
ATG13	0.5	0.473
ATG14	0.5	0.744
ATG16L1	0.5	0.545
ATG16L2	0.5	1.176
ATG2A	0.5	0.614
ATG2B	0.4	0.586
ATG3	0.5	0.887
ATG4B	0.5	0.851
ATG4C	0.5	1.234
ATG4D	0.5	1.196
ATG5	0.5	0.739
ATG7	0.5	0.985
ATG9A	0.5	0.333
ATG9B	0.5	1.399
ATIC	0.5	1.044
ATL1	0.5	0.57
ATL2	0.5	0.647
ATL3	0.5	0.891
ATM	0.875	0.847
ATMIN	0.5	0.695
ATN1	0.5	0.352
ATOH1	0.5	0.767
ATOH7	0.5	1.758
ATOH8	0.5	0.794
ATOX1	0.5	1.361
ATP10A	0.5	0.877
ATP10B	0.5	0.964
ATP10D	0.5	0.707
ATP11A	0.5	0.596
ATP11B	0.5	0.522
ATP12A	0.5	0.848
ATP13A1	0.5	0.592
ATP13A2	0.5	0.713
ATP13A3	0.5	0.428
ATP13A4	0.5	0.896
ATP13A5	0.4375	1.072
ATP1A1	0.5	0.188
ATP1A2	0.5	0.598
ATP1A3	0.5	0.173
ATP1A4	0.5	0.879
ATP1B1	0.5	0.195
ATP1B2	0.5	0.526
ATP1B3	0.5	0.619
ATP23	0.5	1.16
ATP2A1	0.5	0.881
ATP2A2	0.5	0.205
ATP2A3	0.5	0.759
ATP2B1	0.5	0.172
ATP2B2	0.5	0.19
ATP2B4	0.5	0.44
ATP2C1	0.5	0.402
ATP2C2	0.5	1.712
ATP4A	0.5	0.808
ATP4B	0.5	1.04
ATP6V0A1	0.5	0.478
ATP6V0A2	0.5	0.603
ATP6V0A4	0.5	0.916
ATP6V0B	0.5	0.372
ATP6V0C	0.5	0.739
ATP6V0D1	0.5	0.513
ATP6V0D2	0.375	1.37
ATP6V0E1	0.5	0.859
ATP6V0E2	0.5	0.973
ATP6V1A	0.5	0.391
ATP6V1B1	0.625	0.827
ATP6V1B2	0.5	0.457
ATP6V1C1	0.5	1.162
ATP6V1C2	0.5	1.012
ATP6V1D	0.5	0.828
ATP6V1E1	0.5	0.852
ATP6V1E2	0.5	1.935
ATP6V1F	0.5	1.29
ATP6V1G1	0.5	1.921
ATP6V1G2	0.5	1.151
ATP6V1G3	0.5	1.81
ATP6V1H	0.5	0.819
ATP7B	0.5	1.063
ATP8A1	0.5	0.661
ATP8A2	0.5	0.728
ATP8B1	0.5	0.62
ATP8B2	0.5	0.624
ATP8B3	0.416667	1.281
ATP8B4	0.5	1.013
ATP9A	0.5	0.455
ATP9B	0.5	0.857
ATPAF2	0.5	1.1
ATR	0.5	0.518
ATRAID	0.5	1.235
ATRIP	0.5	0.707
ATRN	0	0.395
ATRNL1	0.5	0.538
ATXN1	0.5	0.264
ATXN10	0.5	0.719
ATXN1L	0.5	0.346
ATXN2	0.5	0.319
ATXN2L	0.5	0.297
ATXN3	0.47619	0.581
ATXN7	0.5	0.257
ATXN7L1	0.5	0.345
ATXN7L2	0.5	0.453
ATXN7L3	0.5	0.227
ATXN7L3B	0.5	1.663
AUH	0.5	0.994
AUNIP	0.5	1.691
AUP1	0.5	0.758
AURKA	0.5	0.528
AURKAIP1	0.5	1.921
AURKB	0.5	0.957
AURKC	0.25	0.806
AUTS2	0.5	0.232
AVEN	0.5	1.172
AVIL	0.5	0.81
AVL9	0.5	0.811
AVP	0.5	1.923
AVPI1	0.5	1.171
AVPR1A	0.5	1.264
AVPR1B	0.5	1.194
AXDND1	0.5	0.981
AXIN1	0.5	0.563
AXIN2	0.5	0.397
AXL	0.5	0.625
AZGP1	0.5	1.141
AZI2	0.5	0.685
AZIN1	0.5	0.36
AZIN2	0.5	0.797
AZU1	0.333333	1.73
B3GALNT1	0.5	0.9
B3GALNT2	0.5	1.041
B3GALT1	0.5	0.71
B3GALT2	0.5	0.587
B3GALT4	0.5	1.501
B3GALT5	0.5	1.868
B3GALT6	0.5	1.987
B3GAT1	0.5	0.749
B3GAT2	0.5	1.36
B3GAT3	0	0.825
B3GLCT	0.75	1.109
B3GNT2	0.5	0.673
B3GNT3	0.5	1.03
B3GNT4	0.5	1.916
B3GNT5	0.5	0.568
B3GNT6	0.5
B3GNT7	0.5	1.968
B3GNT8	0.5	1.855
B3GNT9	0.5	1.94
B3GNTL1	0.5	1.374
B4GALNT1	0.5	1.114
B4GALNT2	0.25	1.112
B4GALNT3	0.5	0.835
B4GALNT4	0.5	1.059
B4GALT1	0.5	0.739
B4GALT2	0.5	0.787
B4GALT3	0.5	0.925
B4GALT4	0.5	0.925
B4GALT5	0.5	0.415
B4GALT6	0.5	0.528
B4GALT7	0.75	1.228
B4GAT1	0.5	0.898
B9D1	0.75	1.023
B9D2	0.5	1.518
BAALC	0.5	1.439
BAAT	0.5	1.049
BABAM1	0.5	0.672
BACE1	0.5	0.556
BACE2	0.5	0.574
BACH1	0.5	0.836
BACH2	0.5	0.164
BAD	0.5	1.889
BAG1	0.5	1.477
BAG2	0.5	1.002
BAG3	0.5	0.538
BAG4	0.5	0.704
BAG5	0.5	1.04
BAG6	0.5	0.265
BAHCC1	0.5	1.959
BAHD1	0.5	0.447
BAIAP2	0.5	0.446
BAIAP2L1	0.5	0.669
BAIAP2L2	0.5	1.468
BAIAP3	0.5	1.406
BAK1	0.5	1.197
BAMBI	0.5	1.302
BANF1	0.5	0.286
BANF2	0.5	1.181
BANK1	0.5	1.156
BANP	0.5	0.303
BAP1	0.5	0.324
BARD1	0.5	1.087
BARHL1	0.5	0.419
BARHL2	0.5	0.629
BARX1	0.5	1.266
BARX2	0.5	0.729
BASP1	0.5	1.32
BATF	0.5	0.739
BATF2	0.5	1.522
BATF3	0.5	1.094
BAX	0.5	1.245
BAZ1A	0.5	0.376
BAZ1B	0.5	0.201
BAZ2A	0.5	0.226
BAZ2B	0.5	0.386
BBC3	0.5	1.293
BBIP1	0.5	1.693
BBOF1	0.5	1.032
BBOX1	0.5	0.983
BBS1	0.5	1.003
BBS10	1	1.418
BBS12	0.5	1.419
BBS2	0.5	0.892
BBS4	0.75	0.953
BBS7	0.75	0.701
BBS9	0.5	0.959
BBX	0.5	0.359
BCAM	0.5	1.102
BCAN	0.5	0.695
BCAP29	0.5	1.594
BCAR1	0.5	0.778
BCAR3	0.5	0.584
BCAS1	0.5	0.855
BCAS2	0.5	1.488
BCAS3	0.5	0.58
BCAS4	0.5	1.081
BCAT1	0.5	1.219
BCAT2	0.5	1.038
BCCIP	0.5	1.053
BCDIN3D	0.5	1.069
BCHE	0.5	1.195
BCKDHA	0	1.086
BCKDHB	0.75	1.206
BCKDK	0.5	0.855
BCL10	0.5	0.637
BCL11A	0.5	0.125
BCL11B	0.5	0.462
BCL2	0.5	0.368
BCL2A1	0.5	1.094
BCL2L1	0.5	0.261
BCL2L10	0.5	1.888
BCL2L11	0.5	1.23
BCL2L12	0.5	1.571
BCL2L13	0.5	0.738
BCL2L14	0.5	0.96
BCL2L15	0.5	1.234
BCL2L2	0.5	0.883
BCL3	0.5	0.702
BCL6	0.5	0.221
BCL6B	0.5	0.823
BCL7A	0.5	0.685
BCL7B	0.5	0.867
BCL7C	0.5	0.546
BCL9	0.5	0.374
BCL9L	0.5	0.3
BCLAF1	0.5	0.213
BCO1	0.5	1.17
BCO2	0.25	1.047
BCR	0.5	0.608
BCS1L	0.5	0.958
BDH1	0.5	1.188
BDH2	0.5	1.253
BDKRB1	0.5	1.851
BDKRB2	0.5	1.929
BDNF	0.5	0.233
BDP1	0.5	0.683
BEAN1	0.5	1.45
BECN1	0.5	0.33
BECN2	0.5	1.528
BEGAIN	0.5	0.961
BEND3	0.5	0.339
BEND4	0.5	0.756
BEND5	0.5	0.755
BEND6	0.5	1.085
BEND7	0.5	0.842
BEST1	0.5	1.28
BEST2	0.5	0.966
BEST3	0.5	1.275
BEST4	0.5	1.055
BET1	0.5	1.549
BET1L	0.5	1.662
BFAR	0.5	1.159
BFSP1	0.5	1.371
BFSP2	0.5	1.067
BGLAP	0.5	1.795
BHLHA15	0.5	1.642
BHLHA9	0.5	1.931
BHLHE22	0.5	1.31
BHLHE23	0.5	1.892
BHLHE40	0.5	0.219
BHLHE41	0.5	1.219
BHMT	0.5	0.884
BHMT2	0.5	1.013
BICC1	0.5	0.541
BICD1	0.5	0.487
BICD2	0.5	0.507
BICDL1	0.5	0.444
BICDL2	0.5	1.918
BID	0.5	1.553
BIK	0.5	1.838
BIN1	0.5	0.817
BIN2	0.5	0.766
BIN3	0.5	1.45
BIRC2	0.5	0.381
BIRC3	0.5	0.543
BIRC5	0.5	1.004
BIRC6	0.5	0.213
BIRC7	0.5	1.18
BIVM	0.5	0.669
BLCAP	0.5	0.81
BLID	0.5	1.885
BLK	0.5	1.295
BLM	0.5	0.847
BLMH	0.5	0.724
BLNK	0.5	0.517
BLOC1S1	0.5	0.972
BLOC1S2	0.5	1.085
BLOC1S3	0.5	1.836
BLOC1S4	0.5	1.945
BLOC1S5	0.5	1.625
BLOC1S6	0.666667	1.5
BLVRA	0.5	0.857
BLVRB	0.5	1.718
BLZF1	0.5	1.145
BMF	0.5	0.788
BMP1	0.5	0.648
BMP10	0.5	0.503
BMP2	0.5	0.213
BMP2K	0.333333	0.768
BMP3	0.5	0.835
BMP4	0.5	0.258
BMP5	0.5	0.711
BMP6	0.5	0.523
BMP7	0.5	0.523
BMP8A	0.5	1.337
BMP8B	0.5	1.297
BMPER	0.5	0.652
BMPR1A	0.5	0.195
BMPR1B	0.5	0.331
BMPR2	0.5	0.376
BMS1	0.5	0.507
BMT2	0.5	0.507
BNC1	0.5	0.212
BNC2	0.5	0.365
BNIP1	0.5	1.231
BNIP2	0.5	1.048
BNIP3	0.5	1.095
BNIP3L	0.5	0.659
BNIPL	0.5	0.911
BOC	0.5	0.789
BOD1	0.5	1.335
BOD1L1	0.5	0.412
BOD1L2	0.5	1.797
BOK	0.5	1.824
BOLA1	0.5	1.649
BOLA3	0.5	1.712
BOLL	0.5	0.81
BOP1	0.5	0.913
BORA	0.5	0.759
BORCS5	0.5	1.105
BORCS6	0.5	1.683
BORCS8	0.5	1.104
BPGM	0.5	0.987
BPHL	0.5	1.262
BPI	0.5	1.011
BPIFA1	0.5	1.355
BPIFA2	0.5	1.122
BPIFA3	0.5	1.511
BPIFB1	0.5	0.795
BPIFB2	0.5	0.959
BPIFB4	0.5	1.082
BPIFB6	0.5	1.068
BPIFC	0.5	1.253
BPNT1	0.5	1.125
BPTF	0.625	0.09
BRAF	0.5	0.237
BRAP	0.5	0.766
BRAT1	0.5	1.39
BRCA1	0.9	0.885
BRCA2	0.666667	0.803
BRD1	0.5	0.337
BRD2	0.5	0.28
BRD3	0.5	0.396
BRD4	0.5	0.191
BRD7	0.5	0.336
BRD8	0.5	0.546
BRD9	0.5	0.927
BRDT	0.5	0.801
BRF1	0.5	0.921
BRF2	0.5	0.827
BRI3	0.5	1.326
BRI3BP	0.5	1.099
BRICD5	0.5	1.976
BRINP1	0.5	0.312
BRINP2	0.5	0.411
BRINP3	0.5	0.364
BRIP1	0.9	0.848
BRIX1	0.5	0.626
BRMS1	0.5	0.874
BRMS1L	0.5	0.808
BROX	0.5	1.123
BRPF1	0.5	0.205
BRPF3	0.5	0.256
BRSK1	0.5	0.299
BRSK2	0.5	0.361
BRWD1	0.5	0.447
BSCL2	0.5	0.869
BSDC1	0.5	0.763
BSG	0.5	1.254
BSN	0.5	0.271
BSND	0.5	1.03
BSPH1	0.5	1.435
BSPRY	0.5	1.216
BST1	0.5	1.638
BST2	0.5	0.969
BSX	0.5	1.172
BTAF1	0.5	0.213
BTBD1	0.5	1.105
BTBD10	0.5	0.587
BTBD11	0.5	0.451
BTBD16	0.5	1.246
BTBD17	0.5	1.489
BTBD18	0.5	0.439
BTBD2	0.5	0.635
BTBD3	0.5	0.527
BTBD6	0.5	1.058
BTBD7	0.5	0.542
BTBD8	0.5	0.753
BTBD9	0.5	0.959
BTC	0.5	1.209
BTD	0.5	1.22
BTF3	0.5	0.925
BTG1	0.5	0.458
BTG2	0.5	1.193
BTG3	0.5	0.34
BTG4	0.5	1.072
BTLA	0.5	0.768
BTN1A1	0.5	1.076
BTN2A1	0.5	1.461
BTN2A2	0.5	1.093
BTN3A1	0.5	0.834
BTN3A2	0.375	1.043
BTN3A3	0.5	1.133
BTNL2	0.4375	1.26
BTNL3	0.5	0.85
BTNL8	0.5	0.88
BTNL9	0.5	1.325
BTRC	0.5	0.643
BUB1	0.5	0.727
BUB1B	0.5	0.707
BUB3	0.5	0.77
BUD13	0.5	0.909
BUD31	0.5	0.863
BVES	0.5	0.915
BYSL	0.5	0.632
BZW1	0.5	0.186
BZW2	0.5	0.597
C10orf105	0.5	1.968
C10orf120	0.5	1.865
C10orf53	0.5	1.571
C10orf62	0.5	1.931
C10orf67	0.5	1.887
C10orf71	0.5	1.739
C10orf82	0.5	1.152
C10orf88	0.5	1.034
C10orf90	0.333333	1.032
C10orf95	0.5
C10orf99	0.5	1.636
C11orf1	0.5	1.712
C11orf16	0.5	1.05
C11orf21	0.5	1.828
C11orf24	0.5	1.17
C11orf42	0.5	1.222
C11orf49	0.5	0.997
C11orf52	0.5	1.013
C11orf53	0.5	1.365
C11orf54	0.5	1.057
C11orf58	0.5	0.445
C11orf65	0.5	1.669
C11orf68	0.5	1.86
C11orf71	0.5	1.877
C11orf80	0.75	1.157
C11orf86	0.5	1.625
C11orf87	0.5	0.833
C11orf91	0.5	1.313
C11orf94	0.5	1.577
C11orf96	0.5	1.95
C11orf97	0.5	1.68
C11orf98	0.5	1.409
C12orf29	0.5	1.018
C12orf4	0.5	0.797
C12orf40	0.5	1.219
C12orf42	0.5	1.781
C12orf43	0.5	1.183
C12orf50	0.5	0.797
C12orf54	0.5	1.224
C12orf56	0.5	1.353
C12orf57	0	1.732
C12orf60	0.5	1.869
C12orf71	0.5	1.429
C12orf73	0.5	1.879
C12orf75	0.5	1.858
C12orf76	0.5	1.9
C14orf119	0.5	1.737
C14orf132	0.5	1.895
C14orf180	0.5	1.631
C14orf28	0.5	1.446
C14orf39	0.5	1.306
C14orf93	0.5	0.734
C15orf39	0.5	0.658
C15orf40	0.5	1.07
C15orf48	0.5	1.353
C15orf61	0.5	1.758
C15orf62	0.5	1.37
C15orf65	0.5	1.913
C16orf46	0.5	1.853
C16orf54	0.5	1.141
C16orf72	0.5	0.464
C16orf74	0.5	1.971
C16orf78	0.5	1.022
C16orf82	0.5	1.884
C16orf86	0.5	1.431
C16orf87	0.5	1.479
C16orf89	0.5	1.68
C16orf90	0.5	1.593
C16orf91	0.5	1.908
C16orf92	0.5	1.61
C16orf95	0.5	1.694
C16orf96	0.5	1.241
C17orf100	0.5	1.909
C17orf107	0.5	1.703
C17orf50	0.5	1.678
C17orf58	0.5	1.488
C17orf64	0.5	1.602
C17orf67	0.5	1.678
C17orf75	0.5	0.949
C17orf78	0.5	1.49
C17orf80	0.5	0.761
C17orf97	0.5	1.975
C17orf98	0.5	1.579
C17orf99	0.5	1.15
C18orf21	0.5	1.15
C18orf25	0.5	0.668
C18orf32	0.5	1.56
C18orf54	0.5	1.33
C18orf63	0.5	0.983
C19orf12	0.5	0.568
C19orf18	0.5	1.15
C19orf25	0.5	1.935
C19orf33	0.5	1.654
C19orf38	0.5	0.766
C19orf44	0.5	1.143
C19orf47	0.5	0.868
C19orf53	0.5	1.891
C19orf54	0.5	1.116
C19orf67	0.5	1.019
C19orf71	0.5	1.86
C19orf73	0.5	1.918
C19orf81	0.5	1.337
C19orf84	0.5	1.107
C1D	0.5	0.826
C1GALT1	0.5	0.589
C1GALT1C1L	0.5	1.849
C1orf100	0.5	1.417
C1orf105	0.5	0.915
C1orf109	0.5	0.999
C1orf112	0.5	0.885
C1orf115	0.5	1.981
C1orf116	0.5	1.344
C1orf122	0.5	1.913
C1orf131	0.5	1.099
C1orf141	0.333333	1.895
C1orf146	0.5	1.847
C1orf158	0.5	1.535
C1orf159	0.5	1.128
C1orf162	0.5	1.435
C1orf167	0.5	1.088
C1orf174	0.5	1.099
C1orf185	0.5	1.674
C1orf189	0.5	1.3
C1orf194	0.5	1.494
C1orf198	0.5	0.951
C1orf21	0.5	0.349
C1orf210	0.5	1.849
C1orf216	0.5	1.53
C1orf226	0.5	1.09
C1orf35	0.5	1.719
C1orf43	0.5	0.948
C1orf50	0.5	1.508
C1orf52	0.5	0.615
C1orf53	0.5	1.975
C1orf54	0.5	1.316
C1orf56	0.5	1.005
C1orf68	0.5	1.718
C1orf74	0.5	1.165
C1orf87	0.5	1.155
C1orf94	0.5	1.022
C1QA	0.5	0.997
C1QB	0.5	1.001
C1QBP	0.5	1.155
C1QC	0.5	1.643
C1QL1	0.5	1.723
C1QL2	0.5	1.421
C1QL3	0.5	0.788
C1QL4	0.5	0.893
C1QTNF1	0.5	1.164
C1QTNF12	0.5	1.788
C1QTNF2	0.5	1.383
C1QTNF3	0.5	1.029
C1QTNF4	0.5	1.784
C1QTNF5	0	1.037
C1QTNF6	0.5	1.256
C1QTNF7	0.5	1.12
C1QTNF8	0.5	1.924
C1R	0.5	0.635
C1RL	0.5	1.205
C1S	0.5	0.783
C2	1	0.909
C20orf141	0.5	1.819
C20orf144	0.5	1.973
C20orf173	0.5	1.148
C20orf202	0.5	1.69
C20orf27	0.5	1.045
C20orf85	0.5	1.327
C20orf96	0.5	1.315
C21orf58	0.5	1.544
C21orf62	0.5	1.653
C21orf91	0.5	1.137
C22orf15	0.5	1.462
C22orf23	0.5	1.235
C22orf31	0.5	1.443
C22orf39	0.5	1.962
C22orf42	0.5	1.105
C2CD2	0.5	0.924
C2CD2L	0.5	0.494
C2CD3	0.5	0.637
C2CD4A	0.5	1.963
C2CD4B	0.5
C2CD4C	0.5	1.803
C2CD5	0.5	0.755
C2orf15	0.5	1.207
C2orf42	0.5	0.975
C2orf49	0.5	0.876
C2orf50	0.5	1.876
C2orf66	0.5	1.579
C2orf68	0.5	1.178
C2orf69	0.5	0.914
C2orf72	0.5	1.959
C2orf73	0.5	1.888
C2orf74	0.5	1.134
C2orf76	0.5	1.889
C2orf80	0.5	1.303
C2orf81	0.5	1.428
C2orf88	0.5	1.228
C3	0.5	0.541
C3AR1	0.5	1.58
C3orf14	0.5	1.489
C3orf18	0.5	1.42
C3orf20	0.5	0.995
C3orf22	0.5	1.166
C3orf33	0.5	1.382
C3orf38	0.5	0.92
C3orf52	0.5	1.336
C3orf62	0.5	1.172
C3orf70	0.5	1.267
C3orf80	0.5	1.751
C3orf84	0.5	1.452
C4A	0.5	0.752
C4B	0.625	0.413
C4BPA	0.5	0.717
C4BPB	0.5	1.147
C4orf17	0.5	1.131
C4orf19	0.5	1.66
C4orf3	0.5	1.497
C4orf33	0.5	1.215
C4orf36	0.5	1.445
C4orf45	0.5	1.795
C4orf46	0.5	1.887
C4orf47	0.375	1.362
C4orf48	0.5	1.833
C4orf51	0.5	1.485
C5	0.5	0.779
C5AR1	0.5	1.779
C5AR2	0.5	1.788
C5orf15	0.5	0.975
C5orf22	0.5	0.924
C5orf24	0.5	0.901
C5orf34	0.5	0.879
C5orf46	0.5	1.768
C5orf47	0.5	1.967
C5orf49	0.5	1.863
C5orf51	0.5	0.826
C5orf52	0.5	1.149
C5orf58	0.5	1.784
C5orf63	0.5	1.956
C6	0.833333	1.008
C6orf118	0.5	1.288
C6orf132	0.5	0.865
C6orf136	0.5	0.918
C6orf141	0.5	1.869
C6orf15	0.5	1.942
C6orf163	0.5	1.084
C6orf226	0.5	1.958
C6orf47	0.5	0.61
C6orf52	0.5	1.786
C6orf58	0.5	0.986
C6orf62	0.5	0.766
C6orf89	0.5	0.893
C7	0.5	0.926
C7orf25	0.5	0.794
C7orf26	0.5	0.387
C7orf31	0.5	1.063
C7orf33	0.5	1.685
C7orf50	0.5	1.323
C7orf57	0.5	1.187
C7orf61	0.5	0.654
C8A	0.5	1.168
C8B	0.75	1.18
C8G	0.5	1.809
C8orf33	0.5	1.449
C8orf34	0.5	1.104
C8orf48	0.5
C8orf58	0.5	1.121
C8orf74	0.5	1.858
C8orf76	0.5	1.489
C8orf82	0.5	1.983
C8orf88	0.5	1.909
C8orf89	0.5	1.716
C9	0.5	1.223
C9orf116	0.5	1.674
C9orf131	0.5	1.576
C9orf135	0.5	1.261
C9orf152	0.5	1.743
C9orf153	0.5	1.95
C9orf24	0.5	0.774
C9orf40	0.5	1.418
C9orf43	0.5	0.982
C9orf57	0.5	1.585
C9orf64	0.5	1.12
C9orf72	0.5	0.989
C9orf78	0.5	0.764
C9orf85	0.5	1.512
CA1	0.5	1.8
CA10	0.5	0.682
CA11	0.5	0.679
CA12	0.5	0.968
CA13	0.5	0.855
CA14	0.5	1.167
CA2	0.5	1.491
CA3	0.5	1.215
CA4	0.5	0.975
CA5A	0.5	1.257
CA6	0.5	1.218
CA7	0.5	0.566
CA8	0.5	0.698
CA9	0.5	1.021
CAAP1	0.5	1.136
CAB39	0.5	0.693
CAB39L	0.5	0.901
CABIN1	0.5	0.661
CABLES1	0.5	1.195
CABLES2	0.5	1
CABP1	0.5	0.958
CABP2	0.5	1.299
CABP4	0.5	1.345
CABP5	0.5	1.352
CABP7	0.5	0.817
CABS1	0.5	1.863
CABYR	0.5	1.175
CACFD1	0.5	1.857
CACHD1	0.5	0.633
CACNA1A	0.5	0.331
CACNA1B	0.5	0.425
CACNA1C	0.5	0.186
CACNA1D	0.5	0.253
CACNA1E	0.5	0.221
CACNA1G	0.5	0.406
CACNA1H	0.5	1.059
CACNA1I	0.5	0.525
CACNA1S	0	0.651
CACNA2D1	0.5	0.437
CACNA2D2	0.5	0.396
CACNA2D3	0.5	0.454
CACNA2D4	0.583333	1.175
CACNB1	0.5	0.556
CACNB2	1	0.77
CACNB3	0.5	0.722
CACNB4	0.5	0.778
CACNG1	0.5	1.318
CACNG2	0.5	0.271
CACNG3	0.5	0.296
CACNG4	0.5	0.59
CACNG5	0.5	1.036
CACNG6	0.5	1.601
CACNG7	0.5	0.576
CACNG8	0.5	0.409
CACTIN	0.5	0.465
CACUL1	0.5	0.643
CACYBP	0.5	1.441
CAD	0.5	0.409
CADM1	0.5	0.422
CADM2	0.5	0.516
CADM3	0.5	0.381
CADM4	0.5	0.496
CADPS	0.5	0.445
CADPS2	0.5	0.699
CAGE1	0.5	0.792
CALB1	0.5	0.612
CALB2	0.5	0.958
CALCA	0.5	1.186
CALCB	0.5	1.392
CALCOCO1	0.5	0.629
CALCOCO2	0.5	0.933
CALCR	0.5	1.039
CALCRL	0.5	0.701
CALD1	0.5	0.498
CALHM1	0.5	1.293
CALHM2	0.5	1.212
CALHM3	0.5	1.099
CALM1	0.5	0.276
CALM2	0.5	0.262
CALM3	0.5	0.556
CALML3	0.5	1.708
CALML4	0.5	1.374
CALML5	0.5	1.883
CALML6	0.5	1.648
CALN1	0.5	0.898
CALR	0.5	0.423
CALR3	0.5	1.028
CALU	0.5	0.556
CALY	0.5	1.549
CAMK1	0.5	0.973
CAMK1D	0.5	0.365
CAMK1G	0.5	0.617
CAMK2A	0.5	0.187
CAMK2B	0.5	0.45
CAMK2D	0.5	0.447
CAMK2G	0.5	0.404
CAMK2N1	0.5	1.572
CAMK2N2	0.5	1.103
CAMK4	0.5	1.098
CAMKK1	0.5	0.471
CAMKK2	0.5	0.649
CAMKMT	0.5	1.643
CAMKV	0.5	0.202
CAMLG	0.5	1.227
CAMP	0.5	1.204
CAMSAP1	0.5	0.544
CAMSAP2	0.5	0.196
CAMSAP3	0.5	0.51
CAMTA1	0.5	0.227
CAMTA2	0.5	0.512
CAND1	0.5	0.076
CAND2	0.5	0.815
CANT1	0.75	1.239
CANX	0.5	0.268
CAP1	0.5	0.361
CAP2	0.5	0.763
CAPG	0.5	0.947
CAPN1	0.5	0.977
CAPN10	0.5	1.121
CAPN11	0.5	1.194
CAPN12	0.444444	1.398
CAPN13	0.5	1.121
CAPN14	0.5	1.109
CAPN15	0.5	0.974
CAPN2	0.375	1.026
CAPN3	1	0.896
CAPN5	0.5	0.928
CAPN7	0.5	0.882
CAPN8	0.5	1.184
CAPN9	0.5	1.036
CAPNS1	0.5	1.186
CAPNS2	0.5	1.114
CAPRIN1	0.5	0.372
CAPS	0.5	1.458
CAPSL	0.5	1.17
CAPZA1	0.5	0.329
CAPZA2	0.5	0.444
CAPZA3	0.5	1.31
CAPZB	0.5	0.221
CARD10	0.5	0.678
CARD11	0.5	0.364
CARD14	0.5	1.222
CARD16	0.5	1.16
CARD18	0.5	1.545
CARD19	0.5	1.565
CARD6	0.5	1.487
CARD8	0.25	0.883
CARD9	1	1.143
CARF	0.333333	0.782
CARHSP1	0.5	1.735
CARM1	0.5	0.353
CARMIL1	0.5	0.606
CARMIL2	0.5	0.701
CARMIL3	0.5	0.574
CARNMT1	0.5	1.157
CARNS1	0.5	1.384
CARS2	0.166667	1.225
CARTPT	0.5	0.956
CASC3	0.5	0.466
CASD1	0.5	0.617
CASKIN1	0.5	0.614
CASKIN2	0.5	0.524
CASP1	0.5	0.816
CASP10	0.666667	1.046
CASP14	0.5	1.217
CASP2	0.5	0.936
CASP3	0.5	0.859
CASP4	0.5	0.981
CASP5	0.5	1.044
CASP6	0.5	0.953
CASP7	0.5	0.993
CASP8	0.416667	0.695
CASP9	0.5	0.994
CASQ1	0	0.965
[truncated: 14,773 more rows]
